# Supplementary material for: Training and mentorship as a tool for building African researchers’ capacity in knowledge translation
Source: PubMed Central journal article supplement (PMC8970368; doi:10.1371/journal.pone.0266106), 2022-03-31
Supplement: pone.0266106.s001.pdf [file pone.0266106.s001.pdf]

## S1 Appendix: Pre- and Post-Training Test Tool

### A. Self-reporting questions

Rate your understanding of the following, with 1 being low and 5 high:

| <b>Concepts</b>                                                        | <b>Rating</b> |          |          |          |          |
|------------------------------------------------------------------------|---------------|----------|----------|----------|----------|
|                                                                        | <b>1</b>      | <b>2</b> | <b>3</b> | <b>4</b> | <b>5</b> |
| 1. Policymaking                                                        |               |          |          |          |          |
| 2. The stages of the policymaking process                              |               |          |          |          |          |
| 3. The role of evidence in the policy-making                           |               |          |          |          |          |
| 4. Barriers and facilitators of evidence use in policymaking processes |               |          |          |          |          |

5. Rate your knowledge and skills in preparing effective policy presentations, with 1 being poor and 5 being excellent.

- i. 1
- ii. 2
- iii. 3
- iv. 4
- v. 5

6. Rate your knowledge and skills in writing simply, clearly, and compellingly for policy audiences, with 1 being poor and 5 being excellent.

- i. 1
- ii. 2
- iii. 3
- iv. 4
- v. 5

7. Rate your knowledge and skills in writing policy briefs, with 1 being poor and 5 being excellent.

- vi. 1
- vii. 2
- viii. 3
- ix. 4
- x. 5

8. Rate your knowledge and skills in visualizing data, with 1 being poor and 5 being excellent.

- i. 1
- ii. 2
- iii. 3
- iv. 4
- v. 5

### B. Knowledge-testing questions

1. Which of the following statements describe what a policy is?

- i. A course or principle of action adopted or proposed by a government, party, business, or individual
- ii. Decisions, plans, and actions that are undertaken to achieve specific health care goals within a society
- iii. When tackling an issue is simply avoided
- iv. (i) and (ii)

- v. All of the above
2. Public policy can result from “non-decisions”.
- i. True
  - ii. False
3. The policymaking process is a:
- i. Complex, messy, power-laden, and interest-driven
  - ii. Linear, moving from agenda setting, to policy formulation, to implementation, to evaluation
  - iii. All of the above
4. Which of the following is NOT one of the stages of the policymaking process?
- i. Implementation
  - ii. Agenda setting
  - iii. Formulation
  - iv. Research generation
  - v. Evaluation
5. Which of the following are the three “streams” that need to align or merge in order to open a window of opportunity for policy influence?
- i. Political environment
  - ii. Problems
  - iii. Research evidence
  - iv. Solutions
6. Which of the following are key elements of a communications strategy?
- i. Goals
  - ii. Objectives
  - iii. Messages
  - iv. Evaluation
  - v. All of the above
7. Which of the following is NOT one of the strategies employed in creating a policy window of opportunity to influence policy decisions?
- i. Policy learning
  - ii. Publishing research
  - iii. Attention focusing
  - iv. Policy community strengthening
8. Which of the following are the two main categories of segmenting your research audiences?
- i. Policy actors
  - ii. Primary audiences
  - iii. Media audiences
  - iv. Advocacy stakeholders
  - v. Secondary audiences
9. What do you need to know about your audiences in order to communicate your research to them more effectively?
- i. Their knowledge of your research issue
  - ii. Their sources of information

- iii. Their political interests
- iv. The number of their constituents
- v. Their level of influence
- vi. All the above

10. Which of the following is not a key element of a policy brief?

- i. Problem and policy-oriented
- ii. Analysis-driven
- iii. Evidence-based
- iv. Literature review
- v. Offers viable recommendations
- vi. Appealing layout

11. Effective monitoring and evaluation (M&E) for policy influence requires consideration of:

- i. Shifting contexts
- ii. Relationships and actors
- iii. Different sources of evidence
- iv. Unexpected effects
- v. (i) and (ii)
- vi. All of the above
