# Supplementary material for: Training and mentorship as a tool for building African researchers’ capacity in knowledge translation
Source: PubMed Central journal article supplement (PMC8970368; doi:10.1371/journal.pone.0266106), 2022-03-31
Supplement: pone.0266106.s002.pdf [file pone.0266106.s002.pdf]

**S3 Appendix: Checklist used to assess and provide feedback to participants on their policy presentations**

| Element                                                                                                                                                                                                                    | Yes/No | Comments |
|----------------------------------------------------------------------------------------------------------------------------------------------------------------------------------------------------------------------------|--------|----------|
| 1. Content of presentation                                                                                                                                                                                                 |        |          |
| 1.1 Is the policy problem clearly and concisely defined?                                                                                                                                                                   |        |          |
| 1.2 Is the policy problem contextualised to make it salient? (why should a policymaker pay attention to this problem?)                                                                                                     |        |          |
| 1.3 Do the research findings presented address the policy problem defined?                                                                                                                                                 |        |          |
| 1.4 Are the research findings presented in a clear and concise manner?                                                                                                                                                     |        |          |
| 1.5 Are implications of the research findings presented to help the policymaker appreciate why the research results are important?                                                                                         |        |          |
| 1.6 Are recommendations presented emanating from the research findings and the implications presented?                                                                                                                     |        |          |
| 1.7 Are the recommendations specific?                                                                                                                                                                                      |        |          |
| 2. Language                                                                                                                                                                                                                |        |          |
| 2.1 Was the presentation free of research/technical jargon?                                                                                                                                                                |        |          |
| 2.2 Was language used clear and compelling?                                                                                                                                                                                |        |          |
| 3. Use of visuals: Were appropriate and easy to understand visuals used in the presentation?                                                                                                                               |        |          |
| 4. Was the presentation made in an engaging manner? (presenter's confidence, eye contact audience, etc.)                                                                                                                   |        |          |
| 5. Time management                                                                                                                                                                                                         |        |          |
| 5.1 Was presentation made within the allocated 12 minutes?                                                                                                                                                                 |        |          |
| 5.2 Did the researcher use the time allocated appropriately? (12 minutes were shared adequately to describe the policy problem; present the research findings and explain their implications; and present recommendations) |        |          |
